# Supplementary material for: Boron nitride nanotubes enhance mechanical properties of fibers from nanotube/polyvinyl alcohol dispersions
Source: Royal Society of Chemistry journal article supplement (doi:10.1039/d1na00677k), 2021-10-29
Supplement: d1na00677k1.pdf [file d1na00677k1.pdf]

## Supporting Information

# Boron Nitride Nanotubes Enhance Mechanical Properties of Fibers from Nanotube/Polyvinyl Alcohol Dispersions

Joe F. Khoury, Jacob C. Vitale, Tanner L. Larson, Geyou Ao\*

Department of Chemical and Biomedical Engineering, Washkewicz College of Engineering,  
Cleveland State University, 2121 Euclid Avenue, Cleveland, OH 44115, USA

### Corresponding Author

\* g.ao@csuohio.edu

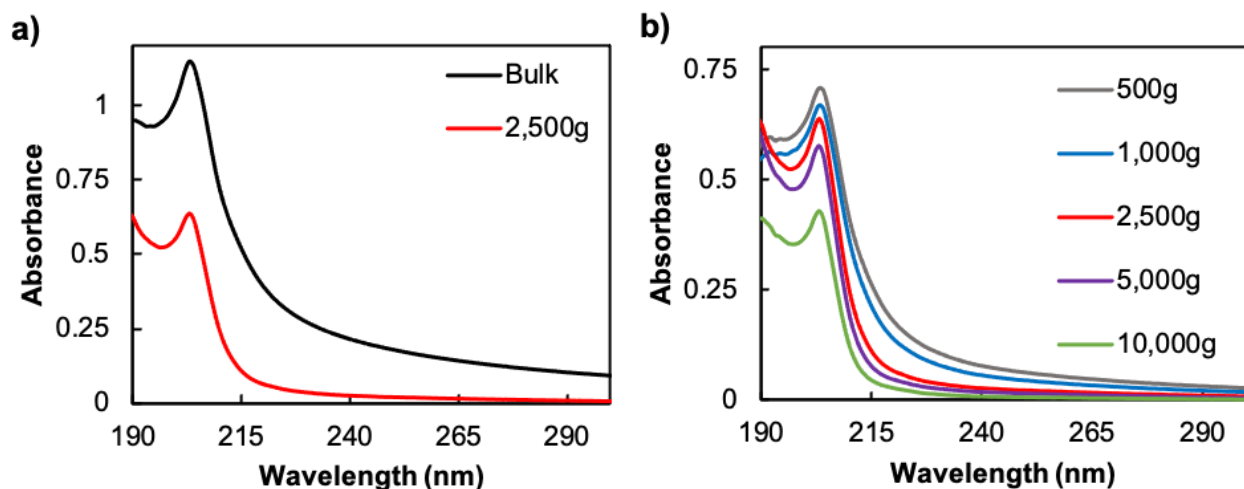

**Figure S1.** Absorbance spectra of (a) bulk (i.e., without centrifugation) and supernatant (i.e., after centrifugation at 2,500g) dispersions as well as (b) supernatant dispersions collected after varying centrifugation at 500-10,000g. The starting sample is 1 mg/mL pristine BNNTs-1 mass % SDC dispersion in water. Samples were diluted by a factor of 200× in DI water for UV-vis absorbance measurements.

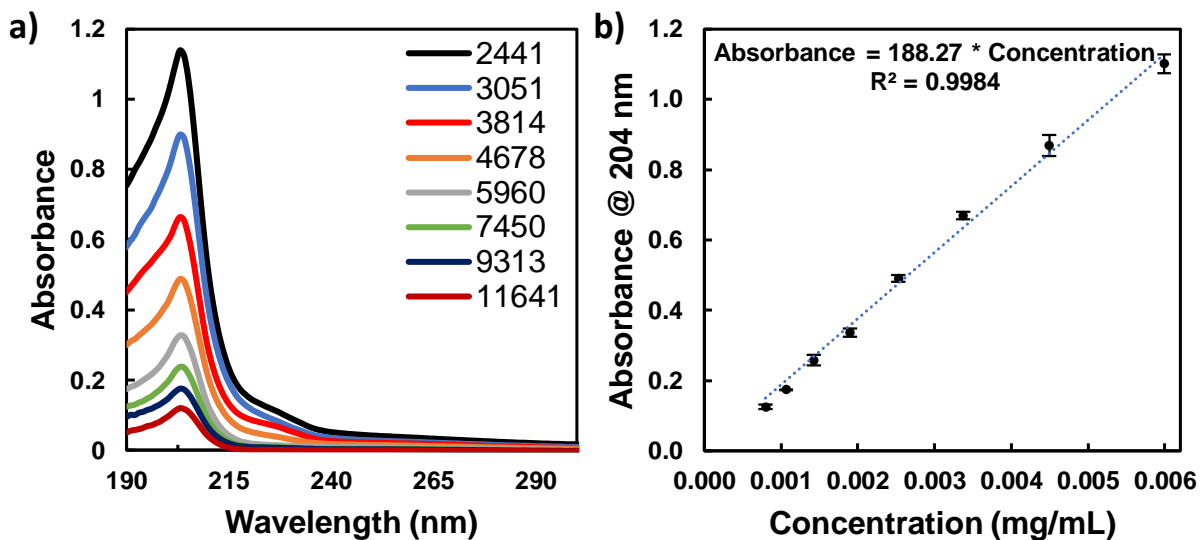

**Figure S2.** Determining the extinction coefficient of SDC-BNNT complexes at 204 nm. (a) Absorbance spectra of a concentrated, supernatant dispersions of pristine BNNTs stabilized by SDC at different dilution factors ranging from 2441 $\times$  to 11641 $\times$  in DI water. (b) The calibration curve of SDC-BNNT absorbance values obtained at 204 nm. The extinction coefficient is determined to be 188.27 mL mg<sup>-1</sup> cm<sup>-1</sup> at 204 nm. Error bars were generated from the standard deviation of three repeats.

**Table S1.** Zeta potentials measured for surfactant-dispersed purified BNNTs in water.

| Surfactant-coated BNNTs | Zeta potential (mV) |
|-------------------------|---------------------|
| SDC-BNNTs               | -53 $\pm$ 0.83      |
| SDS-BNNTs               | -57 $\pm$ 0.16      |
| TTAB-BNNTs              | +52 $\pm$ 0.41      |

**Table S2.** Estimated BNNT contents in BNNTs/PVA fibers based on the compositions of BNNTs/PVA dispersions.

| BNNTs/PVA Dispersions |              |              | BNNTs/PVA Fibers |               |
|-----------------------|--------------|--------------|------------------|---------------|
| BNNTs (mass %)        | SDC (mass %) | PVA (mass %) | BNNTs (mass %)   | BNNTs (vol %) |
| 0.025                 | 0.12         | 5.00         | 0.49             | 0.45          |
| 0.050                 | 0.24         | 5.00         | 0.94             | 0.88          |
| 0.075                 | 0.36         | 5.00         | 1.38             | 1.27          |
| 0.010                 | 0.47         | 5.00         | 1.79             | 1.64          |

\*Conversion of nanotube mass % to vol % is provided for fibers produced from purified BNNTs in 5 mass % PVA solution. BNNT content in dispersions was assumed to be maintained in the resulting BNNTs/PVA fibers.

**Table S3.** Mechanical properties of neat PVA, pristine BNNTs/PVA, and purified BNNTs/PVA fibers produced from dispersions containing 5 mass % PVA in an EtOH coagulation bath.

| Fibers             | BNNTs in dispersion (mass %) | Tensile strength (MPa) | Young's modulus (GPa) | Toughness (J/g) | Strain at failure (%) |
|--------------------|------------------------------|------------------------|-----------------------|-----------------|-----------------------|
| Neat PVA           | 0                            | 185 ± 45               | 1.1 ± 0.1             | 112 ± 31        | 88 ± 40               |
|                    | 0.025                        | 274 ± 65               | 2.1 ± 0.3             | 112 ± 15        | 131 ± 31              |
| Pristine BNNTs/PVA | 0.050                        | 297 ± 46               | 2.1 ± 0.4             | 137 ± 11        | 96 ± 19               |
|                    | 0.075                        | 329 ± 18               | 5.4 ± 0.9             | 99 ± 24         | 65 ± 25               |
|                    | 0.100                        | 445 ± 21               | 6.8 ± 1.2             | 135 ± 19        | 69 ± 13               |
|                    | 0.025                        | 307 ± 62               | 3.8 ± 0.5             | 102 ± 39        | 95 ± 49               |
| Purified BNNTs/PVA | 0.050                        | 411 ± 37               | 3.5 ± 0.2             | 141 ± 21        | 91 ± 23               |
|                    | 0.075                        | 360 ± 3                | 7.1 ± 1.0             | 150 ± 57        | 55 ± 7                |
|                    | 0.100                        | 553 ± 45               | 7.1 ± 0.8             | 166 ± 55        | 65 ± 25               |
|                    | 0.025                        | 307 ± 62               | 3.8 ± 0.5             | 102 ± 39        | 95 ± 49               |

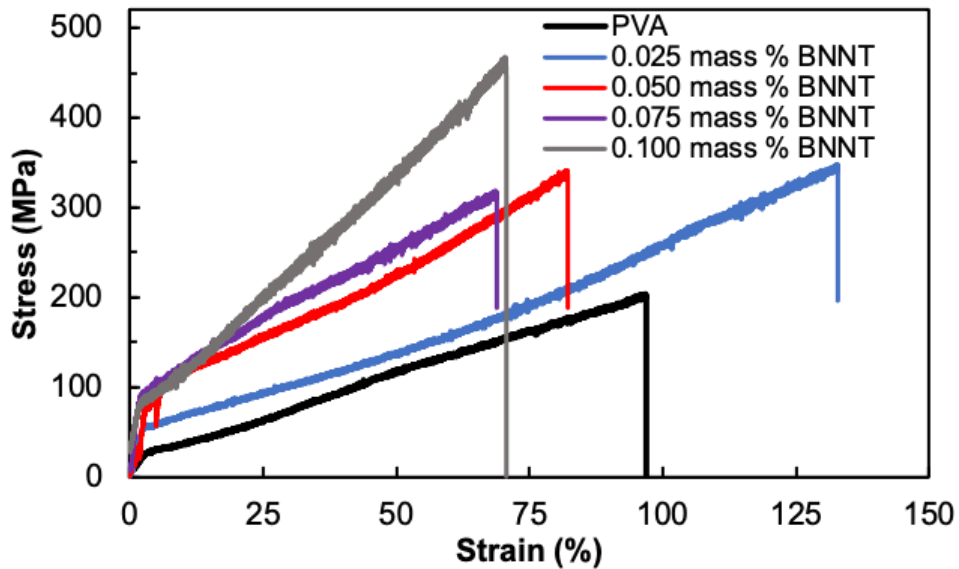

**Figure S3.** Representative stress-strain curves of neat PVA and pristine BNNTs/PVA fibers produced from dispersions with increasing nanotubes concentrations from 0.025 to 0.100 mass % and a constant PVA concentration of 5 mass %. The fibers were produced in an EtOH bath.

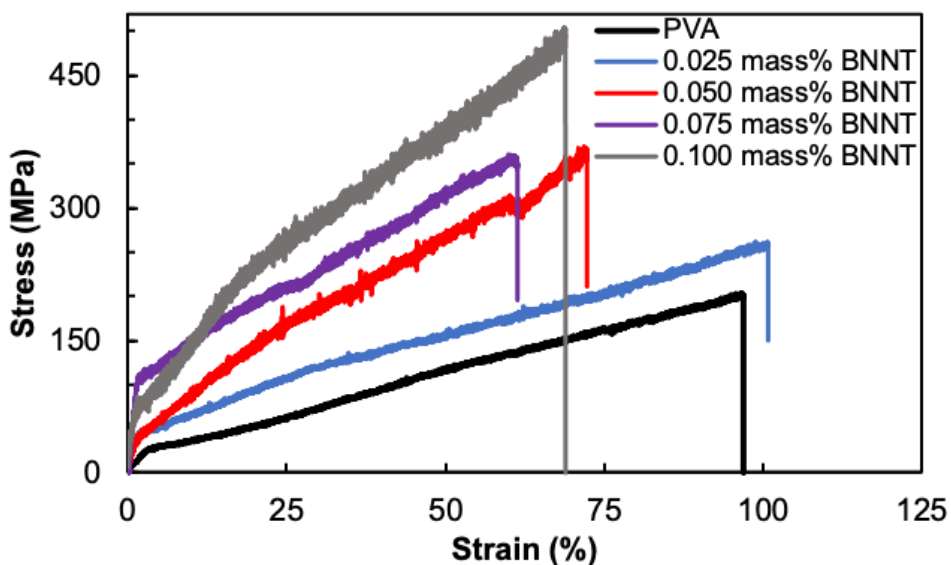

**Figure S4.** Representative stress-strain curves of neat PVA and purified BNNTs/PVA fibers produced from dispersions with increasing nanotube concentrations from 0.025 to 0.100 mass % and a constant PVA concentration of 5 mass %. The fibers were produced in an EtOH bath.

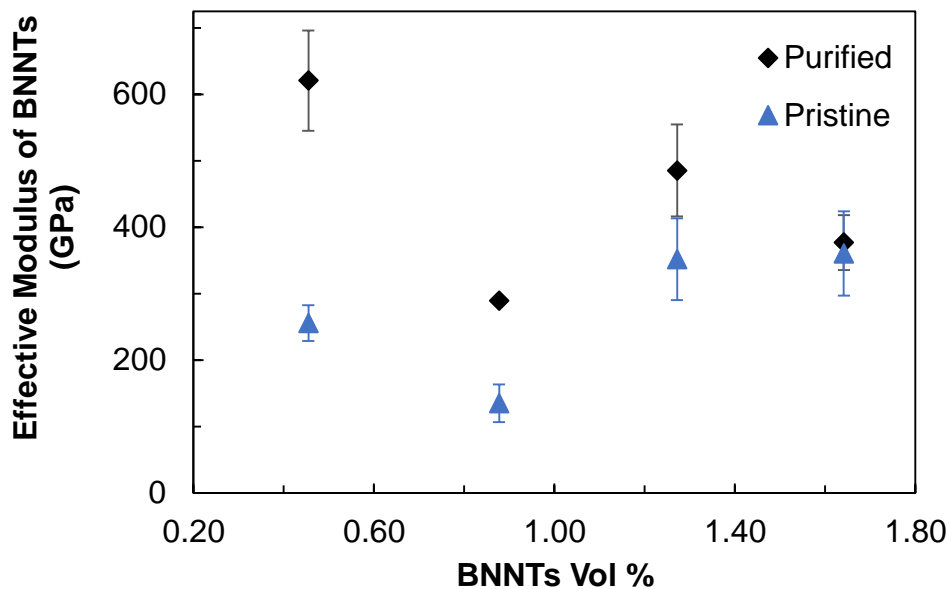

**Figure S5.** Estimated effective modulus of pristine and purified BNNTs as a function of BNNTs vol % in BNNTs/PVA fibers produced from dispersions with a constant PVA concentration of 5 mass %. The fibers were produced in an EtOH bath.

The effective moduli of BNNTs in BNNTs/PVA fibers are estimated based on the rule of mixture<sup>1,2</sup> utilizing  $E_{BNNTs/PVA} = V_{BNNTs}E_{BNNTs} + V_{PVA}E_{PVA}$ , where  $E_{BNNTs/PVA}$ ,  $E_{BNNTs}$ ,  $E_{PVA}$  are the Young's modulus of BNNTs/PVA fibers, BNNTs, and neat PVA fibers, respectively, and  $V_{BNNTs}$  and  $V_{PVA}$  are the volume fractions of BNNTs and PVA in fibers, respectively.

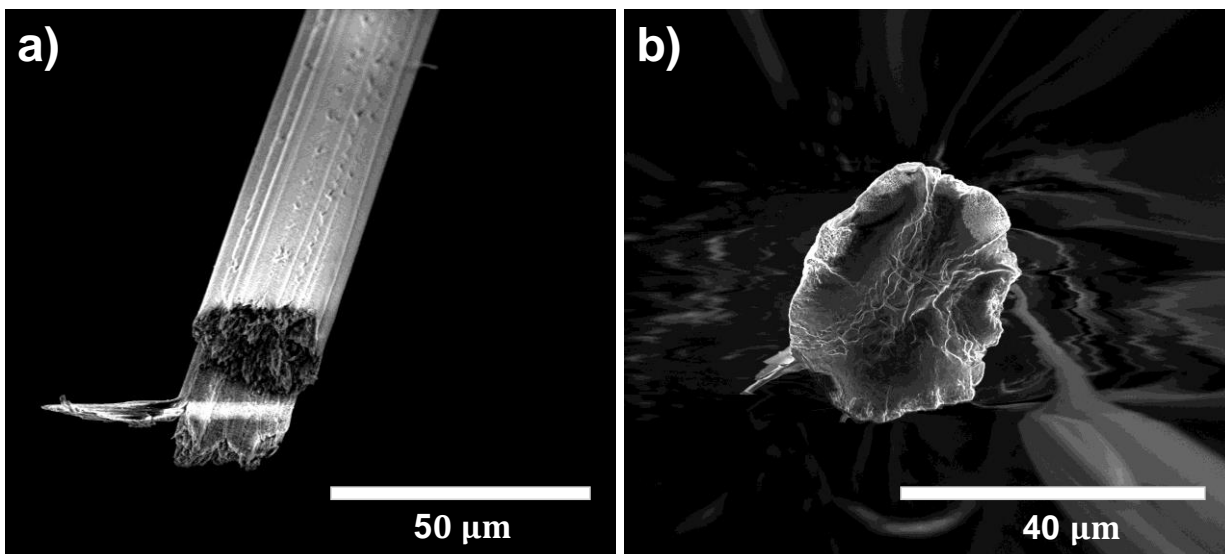

**Figure S6.** SEM image showing the cross section of (a) pristine BNNTs/PVA composite fiber produced from an aqueous solution of 0.025 mass % BNNTs and 5 mass % PVA in EtOH coagulation bath and (b) PVA only fiber produced from an aqueous solution of 5 mass % PVA in an MeOH coagulation bath.

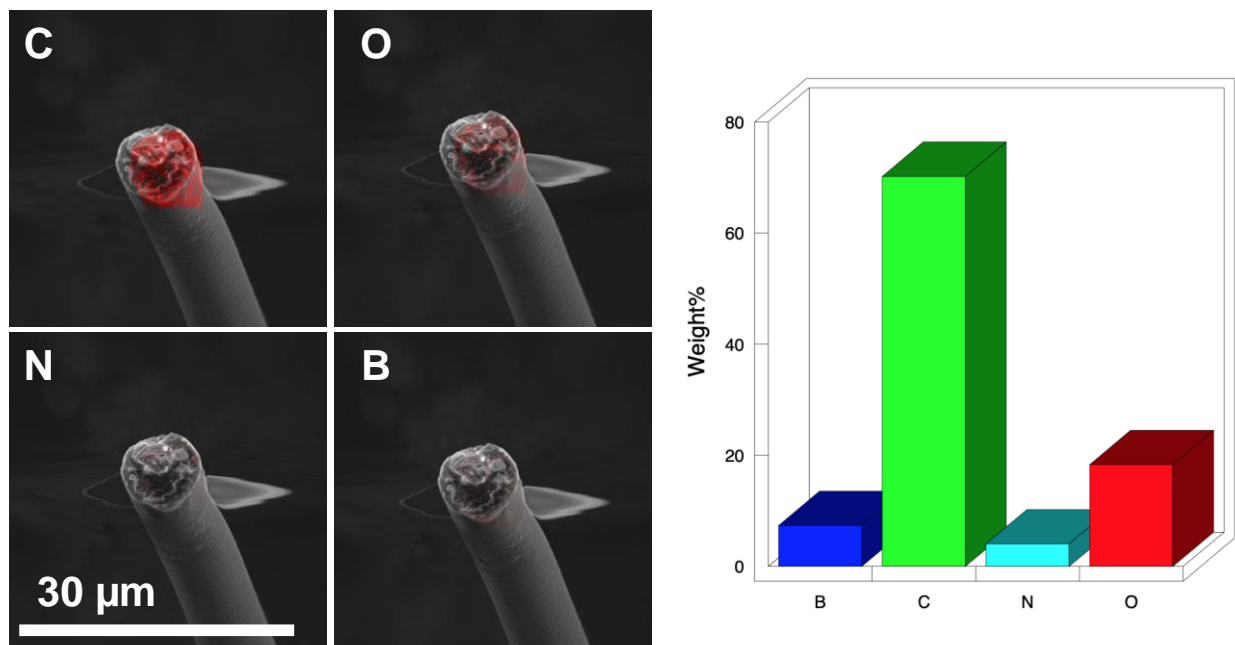

**Figure S7.** Elemental mapping of the cross section of the purified BNNTs/PVA fibers produced from an aqueous solution of 0.1 mass % BNNTs and 2.5 mass % PVA in EtOH coagulation bath.

**Table S4.** Mechanical properties of pristine BNNTs/PVA fibers produced from dispersions containing 0.1 mass % BNNTs and different PVA concentrations of 2.5 and 5 mass %, respectively, in an EtOH coagulation bath.

| PVA concentration (mass %) | BNNTs in dispersion (mass %) | Tensile strength (MPa) | Young's modulus (GPa) | Toughness (J/g) | Strain at failure (%) |
|----------------------------|------------------------------|------------------------|-----------------------|-----------------|-----------------------|
| 2.5                        | 0.1                          | 757 ± 147              | 14.0 ± 3.4            | 112 ± 30        | 60 ± 23               |
| 5.0                        | 0.1                          | 445 ± 21               | 6.8 ± 1.2             | 135 ± 19        | 69 ± 13               |

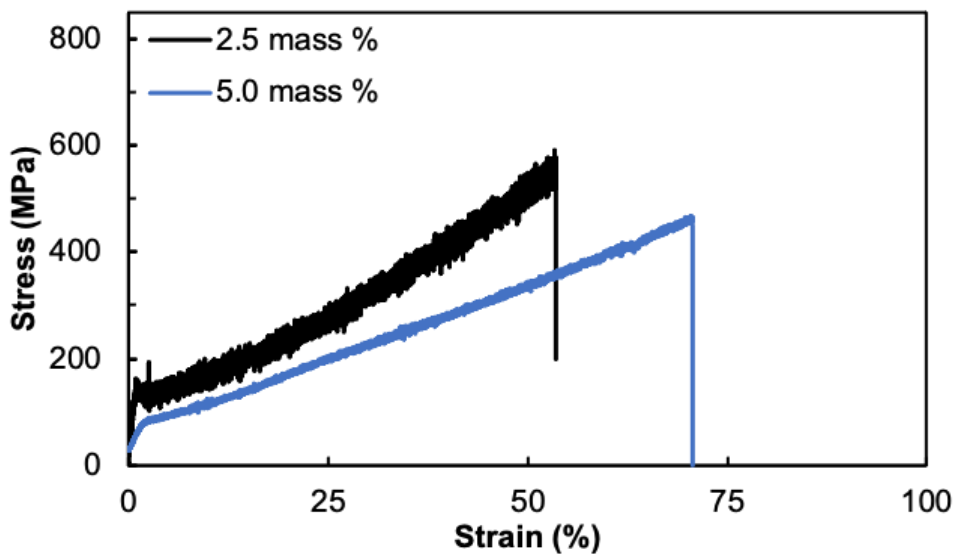

**Figure S8.** Representative stress-strain curves of pristine BNNTs/PVA fibers produced from dispersions containing 0.1 mass% pristine BNNTs and different PVA concentrations of 2.5 and 5 mass %, respectively, in an EtOH coagulation bath.

**Table S5.** Mechanical properties of pristine BNNTs/PVA fibers produced from dispersions containing 0.1 mass % BNNTs and 2.5 mass % PVA in different coagulation baths including MeOH, EtOH, and MeOH/acetone cosolvent containing 25 vol % acetone.

| Coagulation bath | Tensile strength (MPa) | Young's modulus (GPa) | Toughness (J/g) | Strain at failure (%) |
|------------------|------------------------|-----------------------|-----------------|-----------------------|
| Ethanol          | 757 ± 147              | 14.0 ± 3.4            | 112 ± 30        | 60 ± 23               |
| Methanol         | 789 ± 46               | 9.7 ± 3.5             | 140 ± 65        | 47 ± 19               |
| Methanol/Acetone | 313 ± 51               | 7.2 ± 1.5             | 88 ± 17         | 50 ± 13               |

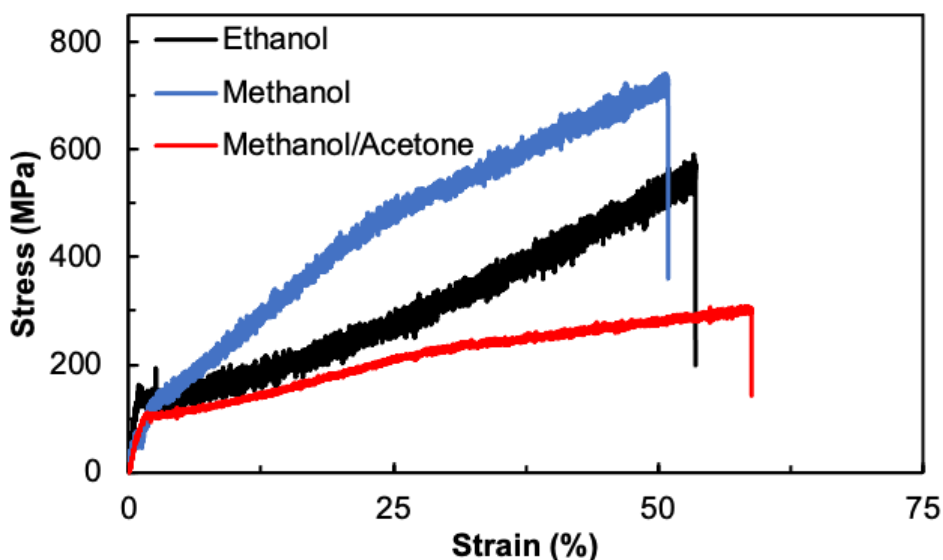

**Figure S9.** Representative stress–strain curves of pristine BNNTs/PVA fibers produced from dispersions containing 0.1 mass % pristine BNNTs and 2.5 mass % PVA in different coagulation baths including MeOH, EtOH, and MeOH/acetone cosolvent of 25 vol % acetone.

#### References:

- (1) You, Y.-J.; Kim, J.-H.; Park, K.-T.; Seo, D.-W.; Lee, T.-H. Modification of Rule of Mixtures for Tensile Strength Estimation of Circular GFRP Rebars. *Polymers* **2017**, *9*, 682.
- (2) Mora, R. J.; Vilatela, J. J.; Windle, A. H. Properties of Composites of Carbon Nanotube Fibers. *Comp. Sci. Technol.* **2009**, *69*, 1558-1563.
